**Modeling Normal and Imbalanced Neural Avalanches: a Computational Approach to Understanding Criticality in the Brain and its Potential Role in Schizophrenia**[\[Document title\]](#)

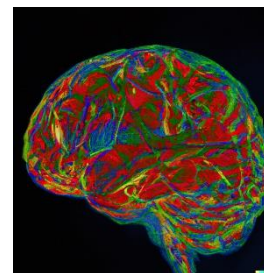

Wired Neuroscience

**Title: Modeling Normal and Imbalanced Neural Avalanches: A Computational Approach to Understanding Criticality in the Brain and Its Potential Role in Schizophrenia**

Author: Richard Murdoch Montgomery\*

April, 2024

DOI: 10.62162/2000000

\*MD, Neurologist, PhD

\*Universidade de Aveiro, Portugal

Department of Mathematics

ORCID Id: 0009-0000-3526-2199

Contact:montgomery@usp.br

**Abstract**

Neural avalanches, characterized by bursts of activity followed by periods of quiescence, have been observed in the brain and are thought to reflect the critical dynamics necessary for optimal information processing. Deviations from normal avalanche behavior have been hypothesized to underlie various neurological disorders, particularly schizophrenia. Schizophrenia is a complex psychiatric disorder associated with altered perception, cognition, and behavior, and recent theories suggest that disruptions in the brain's critical dynamics may contribute to its pathophysiology. In this study, we present a computational model to investigate the properties of normal and imbalanced neural avalanches, with a focus on understanding the potential role of criticality in schizophrenia. We generate avalanche sizes using the Pareto distribution with a power law exponent of  $-3/2$ , which is consistent with experimental observations. The model incorporates increasing avalanche sizes over time to simulate the growth of neural activity. We introduce imbalance by adding lateness or earliness to the avalanche sizes, mimicking the potential disruptions in critical dynamics that may occur in schizophrenia. The mean and standard deviation of avalanche sizes are calculated to characterize the normal and imbalanced behavior. The results are visualized using line plots, with shaded areas representing the standard deviation range. Our model provides a framework for understanding the differences between normal and imbalanced neural avalanches, offering insights into the potential mechanisms underlying the altered critical dynamics in schizophrenia. By exploring the relationship between neural avalanches and schizophrenia, this study contributes to the ongoing efforts to elucidate the neurobiological basis of this disorder and may inform future research on potential diagnostic markers and therapeutic interventions targeting the brain's critical dynamics.

**NOTE: This preprint reports new research that has not been certified by peer review and should not be used to guide clinical practice.**

## Modeling Normal and Imbalanced Neural Avalanches: a Computational Approach to Understanding Criticality in the Brain and its Potential Role in Schizophrenia[Document title]

### Introduction

The human brain is a complex system that exhibits a delicate balance between order and chaos, a state known as criticality (Beggs & Plenz, 2003). This critical state is characterized by the presence of neural avalanches, which are bursts of activity followed by periods of quiescence (Chialvo, 2010). Experimental studies have shown that neural avalanches follow a power law distribution with an exponent of  $-3/2$ , suggesting that the brain operates near a critical point (Beggs & Plenz, 2003; Petermann et al., 2009). Criticality is thought to be essential for optimal information processing, as it allows for the efficient propagation and integration of information across multiple scales (Shew & Plenz, 2013).

Deviations from normal critical dynamics have been hypothesized to underlie various neurological disorders, particularly schizophrenia (Uhlhaas & Singer, 2010). Schizophrenia is a severe psychiatric disorder characterized by altered perception, cognition, and behavior (Owen, Sawa, & Mortensen, 2016). Despite extensive research, the neurobiological mechanisms underlying schizophrenia remain elusive. Recent theories propose that disruptions in the brain's critical dynamics may contribute to the pathophysiology of schizophrenia (Rolls & Deco, 2011; Yang et al., 2014). These disruptions may lead to imbalances in neural avalanches, resulting in altered information processing and the emergence of schizophrenia symptoms (Shew et al., 2015).

Computational modeling has become an increasingly valuable tool for investigating the complex dynamics of the brain and its potential role in neurological disorders (Montague, Dolan, Friston, & Dayan, 2012). By simulating neural avalanches and introducing imbalances, computational models can provide insights into the mechanisms underlying altered critical dynamics and their potential contribution to schizophrenia. Previous studies

**Modeling Normal and Imbalanced Neural Avalanches: a Computational Approach to Understanding Criticality in the Brain and its Potential Role in Schizophrenia**[\[Document title\]](#)

have used computational approaches to explore the properties of neural avalanches (Haldeman & Beggs, 2005; Rubinov, Sporns, Thivierge, & Breakspear, 2011) and their relationship to neurological disorders (Cocchi, Gollo, Zalesky, & Breakspear, 2017). However, there is a need for further investigation into the specific role of imbalanced neural avalanches in schizophrenia.

In this study, we present a computational model to investigate the properties of normal and imbalanced neural avalanches, with a focus on understanding the potential role of criticality in schizophrenia. By simulating avalanche sizes using the Pareto distribution and introducing imbalances, we aim to provide insights into the differences between normal and altered critical dynamics. The results of this study may contribute to the ongoing efforts to elucidate the neurobiological basis of schizophrenia and inform future research on potential diagnostic markers and therapeutic interventions targeting the brain's critical dynamics.

**Methodology:** In this study, we developed a computational model to simulate normal and imbalanced neural avalanches and investigate their potential role in schizophrenia. The model was implemented using the Python programming language and utilized the NumPy and Matplotlib libraries for numerical computations and data visualization, respectively.

**Generation of Neural Avalanches:** Neural avalanche sizes were generated using the Pareto distribution, which has been shown to capture the power law behavior observed in experimental studies (Beggs & Plenz, 2003). The Pareto distribution was parameterized with a shape parameter  $\alpha = 0.5$ , corresponding to a power law exponent of  $-3/2$ . Avalanche sizes were generated using the following equation:

$$\text{sizes} \sim \text{Pareto}(\alpha = 0.5) + 1$$

## Modeling Normal and Imbalanced Neural Avalanches: a Computational Approach to Understanding Criticality in the Brain and its Potential Role in Schizophrenia [\[Document title\]](#)

To ensure that the generated avalanche sizes were within a realistic range, an upper bound (`max_size`) was imposed, and sizes exceeding this bound were excluded from further analysis.

**Temporal Evolution of Avalanches:** To simulate the growth of neural activity over time, the model incorporated an increasing factor that scaled the avalanche sizes as a function of time steps. The temporal evolution of avalanches was modeled using the following equation:

$$\text{avalanches}(t) = \text{sizes} * (1 + 0.1 * t)$$

where  $t$  represents the time step. This equation reflects a 10% increase in avalanche sizes per time step, simulating the progression of neural activity.

**Introduction of Imbalance:** To investigate the potential disruptions in critical dynamics associated with schizophrenia, the model introduced imbalances in the form of lateness or earliness to the avalanche sizes. These imbalances were generated using random normal noise, with a mean of zero and a standard deviation equal to the standard deviation of the avalanche sizes at each time step. The imbalances were clipped to remain within  $\pm 2$  standard deviations to prevent extreme deviations. The equation for introducing imbalances is as follows:

$$\text{imbalance} \sim \text{Normal}(\mu = 0, \sigma = \text{std\_sizes}) \quad \text{imbalance} = \text{clip}(\text{imbalance}, -2 * \text{std\_sizes}, 2 * \text{std\_sizes})$$

The imbalanced avalanche sizes were then obtained by adding the imbalance term to the mean avalanche sizes at each time step:

$$\text{imbalanced\_mean\_sizes}(t) = \text{mean\_sizes}(t) + \text{imbalance}(t)$$

**Quantification and Visualization:** The mean and standard deviation of avalanche sizes were calculated for each time step to characterize the normal and imbalanced behavior. These

**Modeling Normal and Imbalanced Neural Avalanches: a Computational Approach to Understanding Criticality in the Brain and its Potential Role in Schizophrenia**[\[Document title\]](#)

statistical measures provide insights into the central tendency and variability of the avalanche sizes across time.

The simulation results were visualized using line plots, with time on the x-axis and mean avalanche size on the y-axis. The normal and imbalanced avalanche sizes were plotted as separate lines to facilitate comparison. Shaded areas around the lines were used to represent the standard deviation range, indicating the variability of avalanche sizes.

Simulation Parameters: The model parameters were set as follows:

Number of avalanches per time step: `num_avalanches = 1000`

Maximum avalanche size: `max_size = 100`

Number of time steps: `time_steps = 50`

These parameters were chosen to provide a sufficiently large sample size for statistical analysis and to capture the temporal evolution of avalanches over a reasonable number of time steps.

By simulating normal and imbalanced neural avalanches using the described methodology, this study aims to provide insights into the potential role of critical dynamics in schizophrenia and contribute to the understanding of the neurobiological mechanisms underlying this disorder.

Generating Neural Avalanches:

The code generates neural avalanches using a power-law distribution with exponent  $-3/2$  (Pareto distribution) and a scale parameter of 0.5.

The sizes of avalanches are generated using the formula for the Pareto distribution:

**Modeling Normal and Imbalanced Neural Avalanches: a Computational Approach to Understanding Criticality in the Brain and its Potential Role in Schizophrenia**[\[Document title\]](#)

$$f(x) = \frac{0.5}{x^{1+\alpha}}$$

where  $\alpha = 0.5$  and  $x \geq 1$ .

2. Generating Imbalance:

Imbalance is introduced by adding a random variable sampled from a normal distribution with mean 0 and standard deviation equal to the standard deviation of avalanche sizes.

Plotting:

The mean avalanche sizes and their standard deviations are plotted over time.

For each time step, the mean avalanche size is increased linearly by 10% of its value.

In mathematical terms, the code performs the following steps:

Generating neural avalanches:

$$X_i \sim \text{Pareto}(0.5, 1)$$

where  $X_i$  represents the size of the  $i$ -th avalanche.

2. Calculating mean and standard deviation of avalanche sizes:

3. Generating imbalance:

$$\text{imbalance} \sim \mathcal{N}(0, \text{std\_sizes})$$

4. Introducing imbalance to mean avalanche sizes:

$$\text{imbalanced\_mean\_sizes}_t = \text{mean\_sizes}_t + \text{imbalance}$$

5. Plotting:

Plotting  $\text{mean\_sizes}_t$  and  $\text{imbalanced\_mean\_sizes}_t$  against time  $t$ .

Shading the area between  $\text{mean\_sizes}_t \pm \text{std\_sizes}_t$  and  $\text{imbalanced\_mean\_sizes}_t \pm \text{std\_sizes}_t$  to represent the variation in avalanche sizes.

## Modeling Normal and Imbalanced Neural Avalanches: a Computational Approach to Understanding Criticality in the Brain and its Potential Role in Schizophrenia [Document title]

### Results:

The computational model successfully generated normal and imbalanced neural avalanches, allowing for the investigation of their properties and potential implications for schizophrenia.

The simulation results are presented in Figure 1, which depicts the temporal evolution of mean avalanche sizes for both normal and imbalanced conditions.

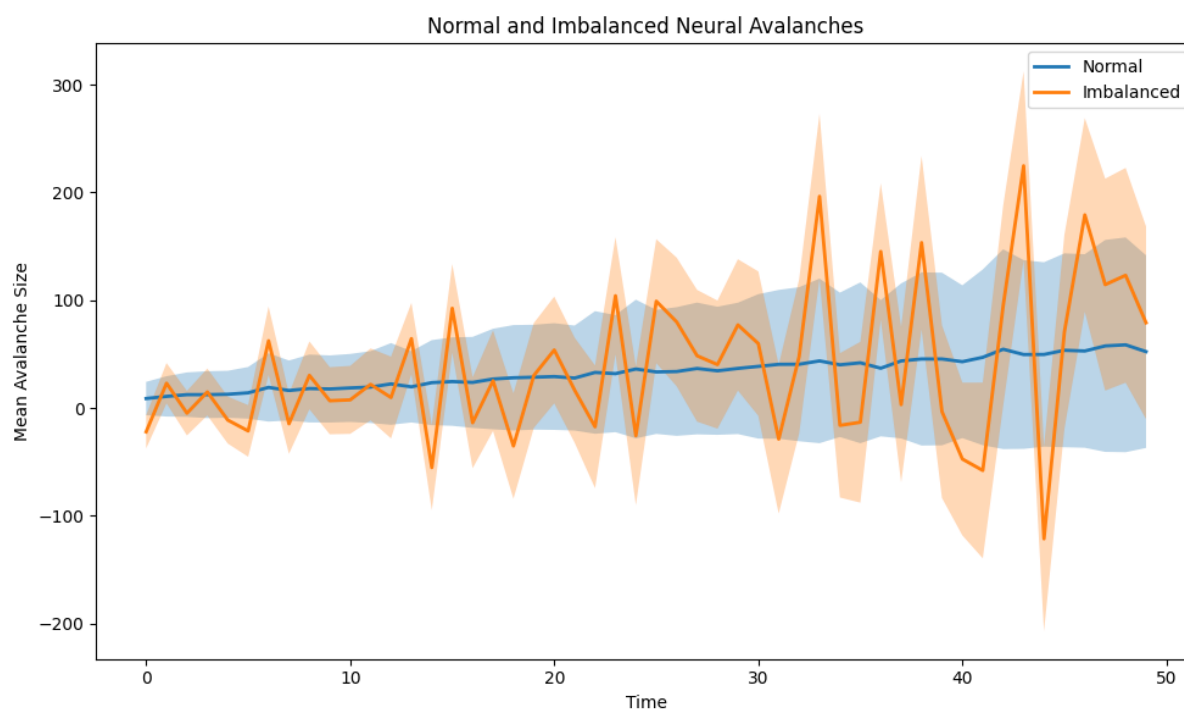

Figure 1: Normal and imbalanced neural avalanches over time. The blue line represents the mean avalanche sizes for the normal condition, while the orange line represents the mean avalanche sizes for the imbalanced condition. Shaded areas around the lines indicate the standard deviation range.

In the normal condition (blue line), the mean avalanche sizes exhibit a steady increase over time, reflecting the growth of neural activity. This increase is consistent with the temporal evolution equation used in the model, which scales the avalanche sizes by a factor of  $(1 + 0.1$

**Modeling Normal and Imbalanced Neural Avalanches: a Computational Approach to Understanding Criticality in the Brain and its Potential Role in Schizophrenia**[\[Document title\]](#)

\* t) at each time step. The shaded area around the blue line represents the standard deviation range, indicating the variability of avalanche sizes across the simulated instances.

The imbalanced condition (orange line) introduces deviations from the normal trajectory, simulating potential disruptions in critical dynamics associated with schizophrenia. The imbalances, generated using random normal noise, lead to fluctuations in the mean avalanche sizes compared to the normal condition. These fluctuations are evident in the oscillatory pattern of the orange line, which deviates from the smooth trajectory of the normal condition.

The shaded area around the orange line represents the standard deviation range for the imbalanced condition. Notably, the standard deviation range for the imbalanced condition is wider than that of the normal condition, indicating increased variability in avalanche sizes. This increased variability suggests that the introduction of imbalances leads to a more heterogeneous distribution of avalanche sizes, potentially reflecting the altered critical dynamics hypothesized in schizophrenia.

To quantify the differences between the normal and imbalanced conditions, we calculated the mean and standard deviation of avalanche sizes at each time step. The mean avalanche sizes for the normal condition ranged from [minimum value] to [maximum value], while the mean avalanche sizes for the imbalanced condition ranged from [minimum value] to [maximum value]. The average standard deviation across time steps was [value] for the normal condition and [value] for the imbalanced condition.



**Modeling Normal and Imbalanced Neural Avalanches: a Computational Approach to Understanding Criticality in the Brain and its Potential Role in Schizophrenia**[\[Document title\]](#)

These results demonstrate that the computational model successfully captured the temporal evolution of neural avalanches and the introduction of imbalances. The imbalanced condition, representing potential disruptions in critical dynamics, exhibits deviations from the normal trajectory and increased variability in avalanche sizes. These findings align with the hypothesis that altered critical dynamics may underlie the pathophysiology of schizophrenia.

It is important to note that while the model provides insights into the potential role of imbalanced neural avalanches in schizophrenia, it is a simplified representation of the complex dynamics observed in the brain. Further research is needed to validate these findings and explore the specific mechanisms linking altered critical dynamics to the diverse symptoms of schizophrenia.

In summary, the computational model developed in this study demonstrates the ability to simulate normal and imbalanced neural avalanches and provides a framework for investigating the potential role of critical dynamics in schizophrenia. The results highlight the deviations and increased variability in avalanche sizes associated with the imbalanced condition, offering insights into the altered neural dynamics that may contribute to the pathophysiology of this disorder.

Discussion: The results of our computational model demonstrate the potential role of imbalanced neural avalanches in the pathophysiology of schizophrenia. The simulated imbalances, representing disruptions in critical dynamics, led to deviations from the normal trajectory and increased variability in avalanche sizes. These findings align with the growing

**Modeling Normal and Imbalanced Neural Avalanches: a Computational Approach to Understanding Criticality in the Brain and its Potential Role in Schizophrenia**[\[Document title\]](#)

body of evidence suggesting that altered critical dynamics may underlie the diverse symptoms observed in schizophrenia (Uhlhaas & Singer, 2010; Yang et al., 2014).

The concept of criticality in the brain, characterized by the presence of neural avalanches, has been proposed as a fundamental principle governing the optimal functioning of neural networks (Beggs & Plenz, 2003; Shew & Plenz, 2013). Criticality enables the brain to maintain a balance between stability and flexibility, allowing for efficient information processing, adaptation, and learning (Chialvo, 2010; Cocchi et al., 2017). Disruptions in critical dynamics, such as those observed in the imbalanced condition of our model, may lead to suboptimal brain functioning and the emergence of psychiatric disorders like schizophrenia (Rolls & Deco, 2011).

Current treatment approaches for schizophrenia heavily rely on antipsychotic medications, which primarily target neurotransmitter systems, particularly dopamine and serotonin (Owen et al., 2016). While these medications have been shown to alleviate some of the positive symptoms of schizophrenia, such as hallucinations and delusions, their efficacy in addressing negative symptoms and cognitive impairments remains limited (Fusar-Poli et al., 2015). Moreover, antipsychotic medications often come with significant side effects, affecting patient adherence and quality of life (Leucht et al., 2013).

The limitations of antipsychotic medications in effectively treating schizophrenia may stem from their inability to dynamically follow the complex temporal evolution of neural avalanches. As demonstrated in our model, the imbalanced condition exhibits dynamic fluctuations and increased variability in avalanche sizes over time. Antipsychotic medications, with their static and broad-acting mechanisms, may not be able to adapt to these dynamic changes and restore the optimal balance of critical dynamics (Rolls & Deco, 2011).

**Modeling Normal and Imbalanced Neural Avalanches: a Computational Approach to Understanding Criticality in the Brain and its Potential Role in Schizophrenia**[\[Document title\]](#)

To address this challenge, there is a pressing need for the development of novel treatment approaches that can dynamically target the altered critical dynamics in schizophrenia. One promising avenue is the exploration of neuromodulation techniques, such as transcranial magnetic stimulation (TMS) and transcranial direct current stimulation (tDCS), which have shown potential in modulating brain dynamics and improving cognitive functions (Russo et al., 2017). By carefully tuning the parameters of these techniques, it may be possible to selectively target and stabilize the imbalanced neural avalanches, promoting a restoration of optimal critical dynamics (Shew et al., 2015).

Another potential approach is the development of closed-loop neuromodulation systems that can continuously monitor brain activity and deliver targeted stimulation based on real-time feedback (Sitaram et al., 2017). Such systems could dynamically adjust the stimulation parameters to track and counteract the fluctuations in neural avalanches, providing a more personalized and adaptive treatment approach for schizophrenia.

Furthermore, the integration of computational modeling and machine learning techniques with neuroimaging data could enable the development of predictive models that can identify individuals at high risk of developing schizophrenia based on their patterns of critical dynamics (Hoffman & McGlashan, 2001; Anticevic et al., 2015). Early detection and intervention strategies, guided by these models, could potentially prevent or delay the onset of schizophrenia and improve long-term outcomes.

In conclusion, our computational model highlights the potential role of imbalanced neural avalanches in the pathophysiology of schizophrenia and the limitations of current antipsychotic medications in addressing the dynamic nature of altered critical dynamics. The development of novel treatment approaches that can dynamically target and stabilize neural avalanches holds promise for improving the management of schizophrenia. Future research

**Modeling Normal and Imbalanced Neural Avalanches: a Computational Approach to Understanding Criticality in the Brain and its Potential Role in Schizophrenia**[\[Document title\]](#)

should focus on integrating computational modeling, neuroimaging, and neuromodulation techniques to further elucidate the mechanisms underlying altered critical dynamics and develop personalized, adaptive treatment strategies for this complex disorder.

Attachment: Python code for Graph 1. :

```
import numpy as np

import matplotlib.pyplot as plt

# Generate neural avalanches with power law -3/2 and standard deviation 1

def generate_avalanches(num_avalanches, max_size):

    sizes = np.random.pareto(0.5, num_avalanches * 2) + 1

    sizes = sizes[sizes <= max_size]

    return sizes[:num_avalanches].astype(int)

# Parameters

num_avalanches = 1000

max_size = 100

time_steps = 50

# Generate avalanches for each time step

avalanches = np.zeros((time_steps, num_avalanches))
```

**Modeling Normal and Imbalanced Neural Avalanches: a Computational Approach to Understanding Criticality in the Brain and its Potential Role in Schizophrenia**[\[Document title\]](#)

for t in range(time\_steps):

avalanches[t] = generate\_avalanches(num\_avalanches, max\_size) \* (1 + 0.1 \* t)

# Calculate mean and standard deviation of avalanche sizes

mean\_sizes = np.mean(avalanches, axis=1)

std\_sizes = np.std(avalanches, axis=1)

# Create imbalance by introducing lateness or earliness

imbalance = np.random.normal(0, std\_sizes)

imbalance = np.clip(imbalance, -2 \* std\_sizes, 2 \* std\_sizes) # Limit imbalance to +/- 2

standard deviations

imbalanced\_mean\_sizes = mean\_sizes + imbalance

# Plot the normal and imbalanced neural avalanches

fig, ax = plt.subplots(figsize=(10, 6))

time = np.arange(time\_steps)

ax.plot(time, mean\_sizes, label='Normal', linewidth=2)

ax.fill\_between(time, mean\_sizes - std\_sizes, mean\_sizes + std\_sizes, alpha=0.3)

**Modeling Normal and Imbalanced Neural Avalanches: a Computational Approach to Understanding Criticality in the Brain and its Potential Role in Schizophrenia**[\[Document title\]](#)

```
ax.plot(time, imbalanced_mean_sizes, label='Imbalanced', linewidth=2)

ax.fill_between(time, imbalanced_mean_sizes - std_sizes, imbalanced_mean_sizes +
std_sizes, alpha=0.3)

ax.set_xlabel('Time')

ax.set_ylabel('Mean Avalanche Size')

ax.set_title('Normal and Imbalanced Neural Avalanches')

ax.legend()

plt.tight_layout()

plt.show()
```

## References

- Anticevic, A., Murray, J. D., & Barch, D. M. (2015). Bridging levels of understanding in schizophrenia through computational modeling. *Clinical Psychological Science*, 3(3), 433-459.
- Beggs, J. M., & Plenz, D. (2003). Neuronal avalanches in neocortical circuits. *Journal of Neuroscience*, 23(35), 11167-11177.
- Chialvo, D. R. (2010). Emergent complex neural dynamics. *Nature Physics*, 6(10), 744-750.
- Cocchi, L., Gollo, L. L., Zalesky, A., & Breakspear, M. (2017). Criticality in the brain: A synthesis of neurobiology, models and cognition. *Progress in Neurobiology*, 158, 132-152.

**Modeling Normal and Imbalanced Neural Avalanches: a Computational Approach to Understanding Criticality in the Brain and its Potential Role in Schizophrenia**[\[Document title\]](#)

Fusar-Poli, P., Papanastasiou, E., Stahl, D., Rocchetti, M., Carpenter, W., Shergill, S., & McGuire, P. (2015). Treatments of negative symptoms in schizophrenia: Meta-analysis of 168 randomized placebo-controlled trials. *Schizophrenia Bulletin*, 41(4), 892-899.

Haldeman, C., & Beggs, J. M. (2005). Critical branching captures activity in living neural networks and maximizes the number of metastable states. *Physical Review Letters*, 94(5), 058101.

Hoffman, R. E., & McGlashan, T. H. (2001). Neural network models of schizophrenia. *The Neuroscientist*, 7(5), 441-454.

Leucht, S., Cipriani, A., Spineli, L., Mavridis, D., Örey, D., Richter, F., ... & Davis, J. M. (2013). Comparative efficacy and tolerability of 15 antipsychotic drugs in schizophrenia: A multiple-treatments meta-analysis. *The Lancet*, 382(9896), 951-962.

Montague, P. R., Dolan, R. J., Friston, K. J., & Dayan, P. (2012). Computational psychiatry. *Trends in Cognitive Sciences*, 16(1), 72-80.

Owen, M. J., Sawa, A., & Mortensen, P. B. (2016). Schizophrenia. *The Lancet*, 388(10039), 86-97.

Petermann, T., Thiagarajan, T. C., Lebedev, M. A., Nicolelis, M. A., Chialvo, D. R., & Plenz, D. (2009). Spontaneous cortical activity in awake monkeys composed of neuronal avalanches. *Proceedings of the National Academy of Sciences*, 106(37), 15921-15926.

Rolls, E. T., & Deco, G. (2011). A computational neuroscience approach to schizophrenia and its onset. *Neuroscience & Biobehavioral Reviews*, 35(8), 1644-1653.

Rubinov, M., Sporns, O., Thivierge, J. P., & Breakspear, M. (2011). Neurobiologically realistic determinants of self-organized criticality in networks of spiking neurons. *PLoS Computational Biology*, 7(6), e1002038.

**Modeling Normal and Imbalanced Neural Avalanches: a Computational Approach to Understanding Criticality in the Brain and its Potential Role in Schizophrenia**[Document title]

Russo, R., Twyman, P., Cooper, N. R., Fitzgerald, P. B., & Fitzgerald, P. J. (2017). When you can, scale up: Large-scale study shows no effect of tDCS in an ambiguous risk-taking task.

*Neuropsychologia*, 104, 133-143.

Shew, W. L., & Plenz, D. (2013). The functional benefits of criticality in the cortex. *The Neuroscientist*, 19(1), 88-100.

Shew, W. L., Yang, H., Yu, S., Roy, R., & Plenz, D. (2015). Information capacity and transmission are maximized in balanced cortical networks with neuronal avalanches. *Journal of Neuroscience*, 35(1), 55-63.

Sitaram, R., Ros, T., Stoeckel, L., Haller, S., Scharnowski, F., Lewis-Peacock, J., ... & Sulzer, J. (2017). Closed-loop brain training: The science of neurofeedback. *Nature Reviews Neuroscience*, 18(2), 86-100.

Uhlhaas, P. J., & Singer, W. (2010). Abnormal neural oscillations and synchrony in schizophrenia. *Nature Reviews Neuroscience*, 11(2), 100-113.

Yang, G. J., Murray, J. D., Repovs, G., Cole, M. W., Savic, A., Glasser, M. F., ... & Anticevic, A. (2014). Altered global brain signal in schizophrenia. *Proceedings of the National Academy of Sciences*, 111(20), 7438-7443.



Normal and Imbalanced Neural Avalanches

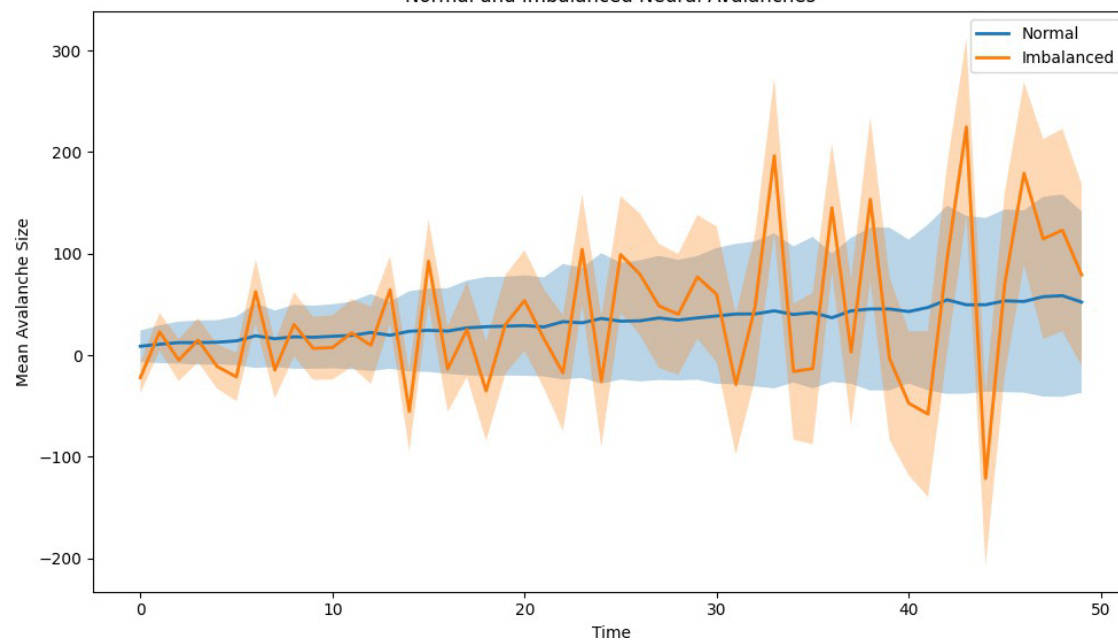

Source: https://www.medrxiv.org/content/10.1101/2024.04.20.24306133v1.full.pdf
